# Supplementary material for: Effect of Continuous Ingestion of Bifidobacteria and Dietary Fiber on Improvement in Cognitive Function: A Randomized, Double-Blind, Placebo-Controlled Trial
Source: MDPI journal article supplement (doi:10.3390/nu15194175), 2023-09-27
Supplement: s1 [file s1]

Table S4. Post-intervention changes in IL-1 $\beta$  and *hs*-CRP scores.

|                       |         | Week 0        | Week 12      |                 | Change         |                 |
|-----------------------|---------|---------------|--------------|-----------------|----------------|-----------------|
|                       |         | Mean (SD)     | Mean (SD)    | <i>P</i> -value | Mean (SD)      | <i>P</i> -value |
| IL-1 $\beta$ , fg/mL  | Placebo | 69.25 (57.37) | 69.3 (43.9)  | 0.283           | 9.34 (46.01)   | 0.584           |
|                       | Active  | 65.86 (40.05) | 94.8 (185.2) | 0.407           | 28.73 (183.68) |                 |
| <i>hs</i> -CRP, mg/dL | Placebo | 0.04 (0.04)   | 0.06 (0.07)  | 0.071           | 0.02 (0.06)    | 0.577           |
|                       | Active  | 0.08 (0.16)   | 0.14 (0.36)  | 0.394           | 0.06 (0.37)    |                 |

Data at week 12 were compared with those at week 0, using the paired *t*-test.  
Comparisons between the placebo and active groups were tested by the unpaired *t*-test.
