# Supplementary material for: Effect of Continuous Ingestion of Bifidobacteria and Dietary Fiber on Improvement in Cognitive Function: A Randomized, Double-Blind, Placebo-Controlled Trial
Source: MDPI journal article supplement (doi:10.3390/nu15194175), 2023-09-27
Supplement: s1 [file s1]

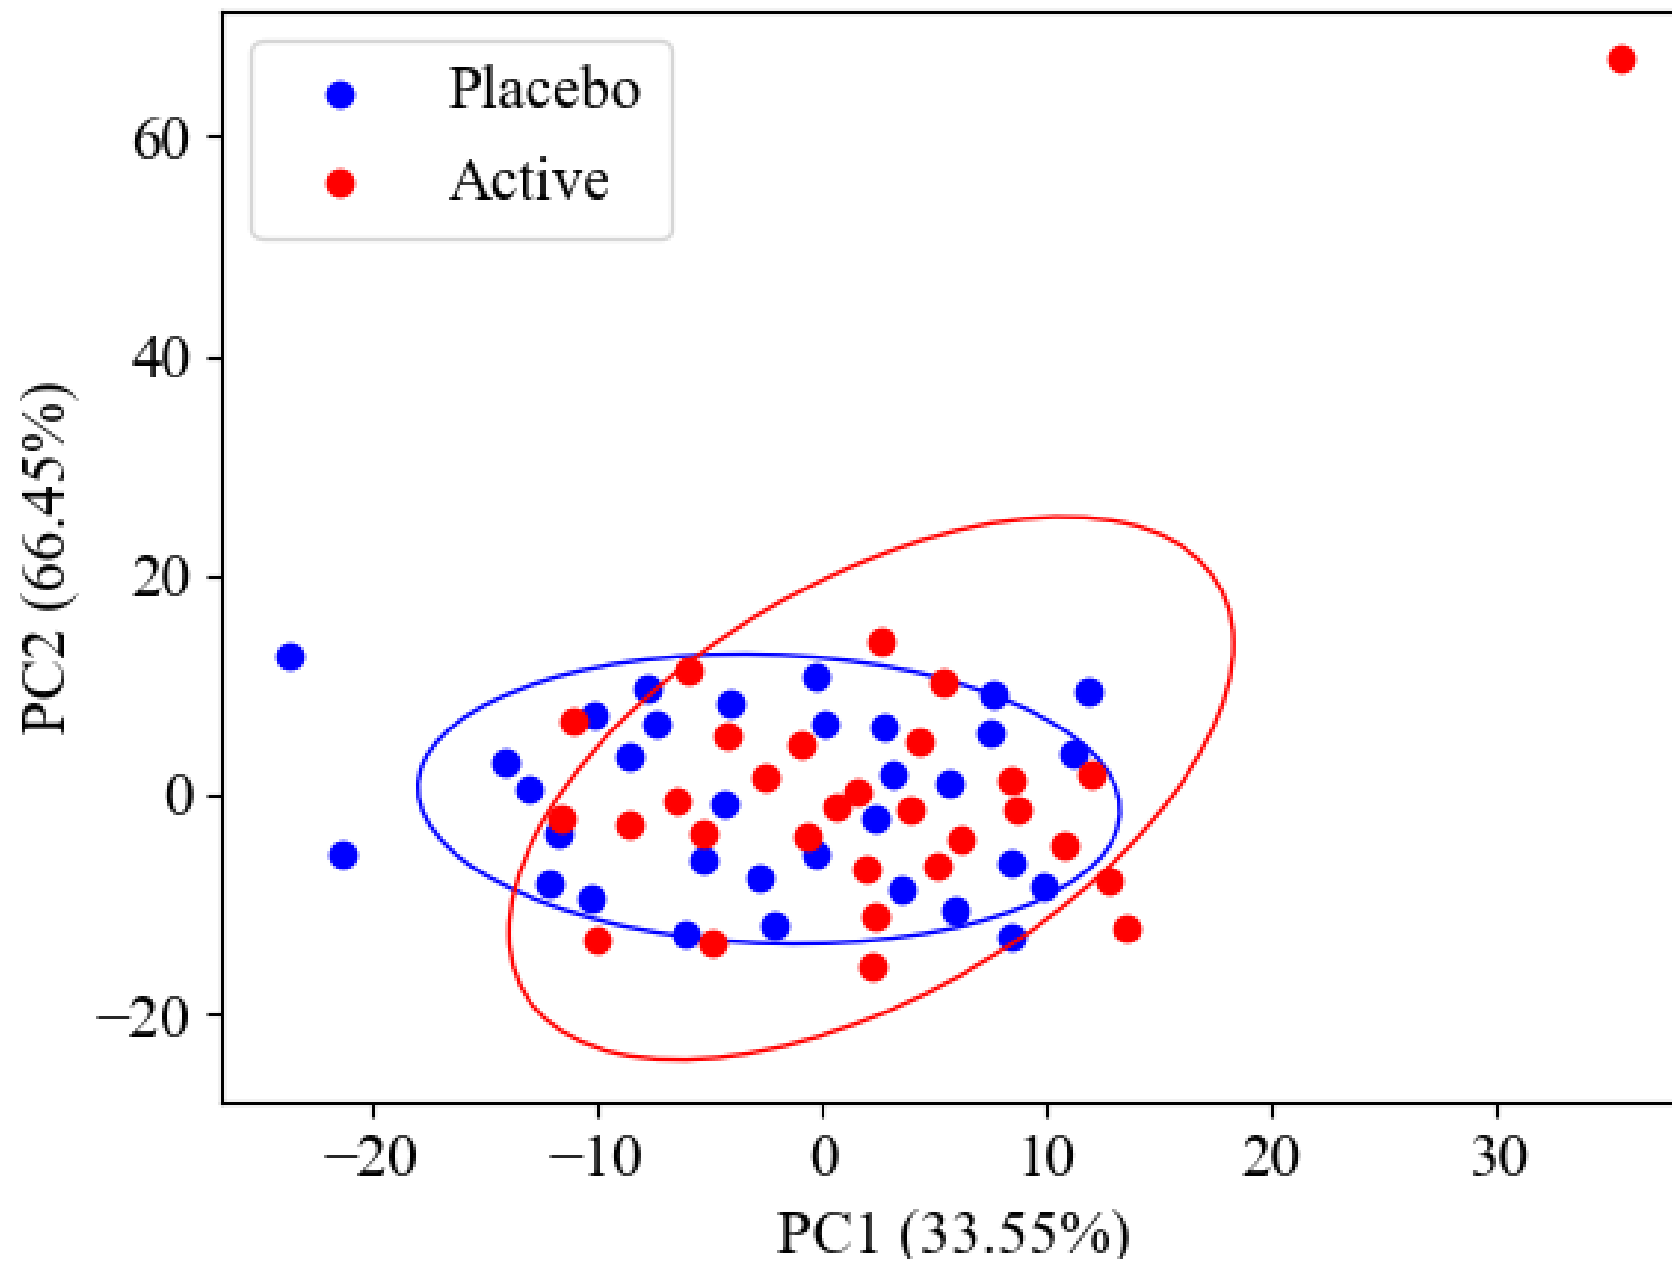

Figure S1. Principal coordinate analysis with  $t$ -distribution ellipses between the placebo and the active groups.
