# Supplementary material for: Effect of Continuous Ingestion of Bifidobacteria and Dietary Fiber on Improvement in Cognitive Function: A Randomized, Double-Blind, Placebo-Controlled Trial
Source: MDPI journal article supplement (doi:10.3390/nu15194175), 2023-09-27
Supplement: s1 [file s1]

Table S2. Post-intervention changes in Cognitrax scores (placebo group:  $n = 32$ ; active group:  $n = 31$ ).

| Task |                            |         | Week 0       | Week 12      |            | Change       |            |
|------|----------------------------|---------|--------------|--------------|------------|--------------|------------|
|      |                            |         | Mean (SD)    | Mean (SD)    | $P$ -value | Mean (SD)    | $P$ -value |
| VBM  | Correct hits (immediate)   | Placebo | 102.8 (13.5) | 106.2 (12.4) | 0.119      | 103.8 (13.6) | 0.688      |
|      |                            | Active  | 103.5 (11.7) | 107.9 (10.6) | 0.047      | 107.7 (11.6) | 0.068      |
|      |                            | Placebo |              | 3.5 (12.2)   | 0.763      | 1.0 (14.0)   | 0.344      |
|      |                            | Active  |              | 4.4 (11.8)   |            | 4.2 (12.2)   |            |
|      | Correct passes (immediate) | Placebo | 107.3 (7.5)  | 106.2 (9.1)  | 0.498      | 105.9 (7.0)  | 0.506      |
|      |                            | Active  | 103.5 (19.0) | 102.6 (13.2) | 0.762      | 106.1 (10.2) | 0.387      |
|      |                            | Placebo |              | -1.1 (9.0)   | 0.936      | -1.3 (11.0)  | 0.271      |
|      |                            | Active  |              | -0.8 (15.3)  |            | 2.6 (16.4)   |            |
|      | Correct hits (delayed)     | Placebo | 103.5 (12.4) | 101.1 (15.6) | 0.319      | 101.6 (13.7) | 0.447      |
|      |                            | Active  | 100.9 (13.6) | 103.8 (16.2) | 0.315      | 105.4 (15.2) | 0.148      |
|      |                            | Placebo |              | -2.4 (13.6)  | 0.156      | -1.9 (14.0)  | 0.106      |
|      |                            | Active  |              | 2.9 (15.8)   |            | 4.5 (16.8)   |            |
|      | Correct passes (delayed)   | Placebo | 102.0 (11.9) | 104.4 (8.9)  | 0.338      | 103.7 (10.3) | 0.541      |
|      |                            | Active  | 105.6 (8.5)  | 105.2 (9.2)  | 0.727      | 102.4 (12.4) | 0.169      |
|      |                            | Placebo |              | 2.3 (13.6)   | 0.311      | 1.7 (15.2)   | 0.170      |
|      |                            | Active  |              | -0.5 (7.1)   |            | -3.3 (13.0)  |            |
| VIM  | Correct hits (immediate)   | Placebo | 95.2 (15.8)  | 93.8 (17.2)  | 0.698      | 90.8 (16.5)  | 0.236      |
|      |                            | Active  | 95.0 (14.8)  | 99.4 (13.4)  | 0.170      | 96.6 (10.9)  | 0.574      |
|      |                            | Placebo |              | -1.3 (19.0)  | 0.217      | -4.3 (20.3)  | 0.202      |
|      |                            | Active  |              | 4.5 (17.6)   |            | 1.7 (16.4)   |            |

|     |                            |         |              |              |       |              |       |
|-----|----------------------------|---------|--------------|--------------|-------|--------------|-------|
| FTT | Correct passes (immediate) | Placebo | 109.3 (10.8) | 107.4 (9.5)  | 0.314 | 108.3 (12.3) | 0.587 |
|     |                            | Active  | 108.4 (9.9)  | 108.8 (10.1) | 0.867 | 109.2 (12.8) | 0.733 |
|     |                            | Placebo |              | −1.9 (10.5)  | 0.455 | −1.1 (10.9)  | 0.542 |
|     |                            | Active  |              | 0.4 (13.9)   |       | 0.8 (13.5)   |       |
|     | Correct hits (delayed)     | Placebo | 92.5 (15.7)  | 88.9 (17.8)  | 0.232 | 95.1 (17.2)  | 0.401 |
|     |                            | Active  | 96.8 (13.9)  | 99.3 (14.9)  | 0.267 | 96.5 (15.2)  | 0.909 |
|     |                            | Placebo |              | −3.6 (16.5)  | 0.105 | 2.6 (17.4)   | 0.469 |
|     |                            | Active  |              | 2.5 (12.1)   |       | −0.3 (14.1)  |       |
|     | Correct passes (delayed)   | Placebo | 109.2 (11.6) | 105.1 (14.8) | 0.205 | 102.3 (14.4) | 0.014 |
|     |                            | Active  | 106.0 (12.9) | 103.2 (13.2) | 0.186 | 104.5 (15.0) | 0.497 |
|     |                            | Placebo |              | −4.1 (17.8)  | 0.748 | −6.9 (14.9)  | 0.120 |
|     |                            | Active  |              | −2.8 (11.7)  |       | −1.5 (12.0)  |       |
|     | Right taps, average        | Placebo | 102.0 (9.0)  | 103.6 (8.8)  | 0.153 | 103.1 (11.2) | 0.441 |
|     |                            | Active  | 101.6 (12.3) | 103.5 (10.1) | 0.074 | 102.8 (10.9) | 0.350 |
|     |                            | Placebo |              | 1.6 (6.3)    | 0.887 | 1.2 (8.4)    | 0.985 |
|     |                            | Active  |              | 1.8 (5.5)    |       | 1.2 (7.0)    |       |
|     | Left taps, average         | Placebo | 97.3 (12.2)  | 99.0 (11.3)  | 0.130 | 97.8 (12.0)  | 0.673 |
|     |                            | Active  | 96.5 (11.2)  | 97.8 (11.2)  | 0.309 | 96.5 (10.9)  | 0.984 |
|     |                            | Placebo |              | 1.7 (6.1)    | 0.811 | 0.5 (6.6)    | 0.788 |
|     |                            | Active  |              | 1.3 (6.9)    |       | 0.0 (8.8)    |       |
| SDC | Correct responses          | Placebo | 113.5 (8.4)  | 115.1 (9.5)  | 0.199 | 116.2 (9.5)  | 0.028 |
|     |                            | Active  | 113.5 (8.5)  | 116.8 (11.0) | 0.031 | 117.5 (9.2)  | 0.004 |

|             |                                     |         |              |              |       |              |        |
|-------------|-------------------------------------|---------|--------------|--------------|-------|--------------|--------|
| ST (part 1) | Errors                              | Placebo |              | 1.6 (6.7)    | 0.354 | 2.7 (6.7)    | 0.477  |
|             |                                     | Active  |              | 3.3 (8.2)    |       | 4.0 (7.2)    |        |
|             |                                     | Placebo | 106.8 (8.4)  | 107.0 (9.9)  | 0.926 | 104.1 (12.7) | 0.303  |
|             |                                     | Active  | 102.9 (12.5) | 106.8 (7.2)  | 0.193 | 107.8 (7.6)  | 0.092  |
|             | Simple reaction time (ms)           | Placebo |              | 0.2 (13.2)   | 0.332 | -2.7 (14.5)  | 0.051  |
|             |                                     | Active  |              | 3.8 (16.1)   |       | 4.9 (15.6)   |        |
|             |                                     | Placebo | 93.7 (11.0)  | 97.5 (6.7)   | 0.025 | 98.4 (7.0)   | 0.009  |
|             |                                     | Active  | 95.9 (9.7)   | 97.0 (9.7)   | 0.551 | 98.3 (9.6)   | 0.191  |
|             | Complex reaction time, correct (ms) | Placebo |              | 3.8 (9.2)    | 0.252 | 4.8 (9.6)    | 0.330  |
|             |                                     | Active  |              | 1.1 (9.8)    |       | 2.4 (9.8)    |        |
|             |                                     | Placebo | 93.0 (11.2)  | 93.6 (11.1)  | 0.695 | 96.2 (10.4)  | 0.018  |
|             |                                     | Active  | 95.5 (10.1)  | 96.7 (11.6)  | 0.419 | 99.2 (10.2)  | 0.011  |
| ST (part 2) | Stroop reaction time, correct (ms)  | Placebo |              | 0.6 (8.0)    | 0.740 | 3.2 (7.1)    | 0.767  |
|             |                                     | Active  |              | 1.3 (8.5)    |       | 3.7 (7.6)    |        |
|             |                                     | Placebo | 96.9 (10.6)  | 96.8 (12.1)  | 0.896 | 101.1 (10.9) | <0.001 |
|             |                                     | Active  | 98.3 (8.5)   | 100.8 (8.8)  | 0.046 | 102.4 (8.3)  | 0.008  |
|             | Stroop commission errors            | Placebo |              | -0.2 (6.7)   | 0.119 | 4.2 (4.8)    | 0.957  |
|             |                                     | Active  |              | 2.5 (6.7)    |       | 4.1 (8.0)    |        |
|             |                                     | Placebo | 99.5 (12.7)  | 104.9 (6.4)  | 0.015 | 102.0 (8.9)  | 0.228  |
|             |                                     | Active  | 99.6 (9.2)   | 101.8 (10.4) | 0.405 | 102.1 (7.4)  | 0.192  |
| ST (part 3) |                                     | Placebo |              | 5.5 (12.0)   | 0.322 | 2.5 (11.5)   | 0.977  |
|             |                                     | Active  |              | 2.2 (14.3)   |       | 2.4 (10.1)   |        |

|     |                             |         |              |               |       |              |        |
|-----|-----------------------------|---------|--------------|---------------|-------|--------------|--------|
| SAT | Correct responses           | Placebo | 98.9 (9.6)   | 101.5 (8.6)   | 0.010 | 103.9 (10.0) | <0.001 |
|     |                             | Active  | 93.4 (10.4)  | 98.2 (10.5)   | 0.020 | 102.7 (7.4)  | <0.001 |
|     |                             | Placebo |              | 2.6 (5.4)     | 0.318 | 5.1 (7.2)    | 0.064  |
|     |                             | Active  |              | 4.8 (11.0)    |       | 9.3 (10.5)   |        |
|     | Errors                      | Placebo | 108.7 (8.5)  | 110.5 (5.0)   | 0.117 | 111.3 (6.9)  | 0.023  |
|     |                             | Active  | 102.8 (11.8) | 107.9 (7.4)   | 0.032 | 111.4 (4.9)  | <0.001 |
|     |                             | Placebo |              | 1.8 (6.5)     | 0.200 | 2.6 (6.1)    | 0.017  |
|     |                             | Active  |              | 5.1 (12.6)    |       | 8.6 (12.1)   |        |
|     | Reaction time, correct (ms) | Placebo | 102.0 (12.1) | 104.4 (11.7)  | 0.100 | 108.0 (11.8) | 0.001  |
|     |                             | Active  | 100.1 (10.1) | 101.9 (10.6)  | 0.383 | 106.5 (8.1)  | 0.001  |
|     |                             | Placebo |              | 2.4 (8.0)     | 0.798 | 6.0 (9.8)    | 0.906  |
|     |                             | Active  |              | 1.8 (11.2)    |       | 6.3 (9.7)    |        |
| CPT | Correct responses           | Placebo | 93.8 (32.0)  | 97.4 (31.2)   | 0.657 | 98.8 (15.3)  | 0.426  |
|     |                             | Active  | 101.6 (8.5)  | 82.5 (112.0)  | 0.356 | 99.9 (12.8)  | 0.552  |
|     |                             | Placebo |              | 3.6 (45.8)    | 0.298 | 5.0 (35.1)   | 0.334  |
|     |                             | Active  |              | -19.0 (112.9) |       | -1.7 (15.8)  |        |
|     | Omission errors             | Placebo | 93.8 (32.0)  | 97.4 (31.2)   | 0.657 | 98.8 (15.3)  | 0.426  |
|     |                             | Active  | 101.6 (8.5)  | 82.5 (112.0)  | 0.356 | 99.9 (12.8)  | 0.552  |
|     |                             | Placebo |              | 3.6 (45.8)    | 0.298 | 5.0 (35.1)   | 0.334  |
|     |                             | Active  |              | -19.0 (112.9) |       | -1.7 (15.8)  |        |
|     | Commission errors           | Placebo | 105.4 (6.6)  | 104.0 (10.0)  | 0.518 | 104.8 (8.5)  | 0.655  |
|     |                             | Active  | 106.4 (5.4)  | 86.8 (105.2)  | 0.315 | 106.7 (5.2)  | 0.837  |

|      |                                     |         |             |               |       |              |       |
|------|-------------------------------------|---------|-------------|---------------|-------|--------------|-------|
| POET | Reaction time, correct              | Placebo |             | −1.4 (12.2)   | 0.343 | −0.6 (7.1)   | 0.658 |
|      |                                     | Active  |             | −19.5 (106.4) |       | 0.3 (8.7)    |       |
|      |                                     | Placebo | 85.0 (17.5) | 86.8 (14.1)   | 0.370 | 85.8 (15.2)  | 0.574 |
|      |                                     | Active  | 90.9 (10.5) | 90.9 (12.3)   | 0.958 | 90.8 (11.2)  | 0.929 |
|      | Correct responses                   | Placebo |             | 1.9 (11.7)    | 0.199 | 0.8 (8.1)    | 0.615 |
|      |                                     | Active  |             | −2.9 (17.3)   |       | −0.1 (6.0)   |       |
|      |                                     | Placebo | 85.3 (19.2) | 88.9 (17.1)   | 0.305 | 84.7 (19.3)  | 0.864 |
|      |                                     | Active  | 81.2 (24.7) | 92.2 (19.6)   | 0.013 | 95.5 (15.7)  | 0.002 |
|      | Average reaction time, correct (ms) | Placebo |             | 3.6 (19.7)    | 0.178 | −0.6 (19.5)  | 0.007 |
|      |                                     | Active  |             | 11.0 (23.2)   |       | 14.3 (22.8)  |       |
|      |                                     | Placebo | 91.2 (17.6) | 87.3 (17.7)   | 0.062 | 92.3 (19.6)  | 0.564 |
|      |                                     | Active  | 90.6 (16.6) | 91.5 (18.8)   | 0.756 | 94.0 (18.5)  | 0.216 |
|      | Omission errors                     | Placebo |             | −3.9 (11.4)   | 0.167 | 1.1 (10.9)   | 0.494 |
|      |                                     | Active  |             | 0.9 (15.5)    |       | 3.4 (14.9)   |       |
|      |                                     | Placebo | 85.3 (19.2) | 88.9 (17.1)   | 0.305 | 84.7 (19.3)  | 0.864 |
|      |                                     | Active  | 81.2 (24.7) | 92.2 (19.6)   | 0.013 | 95.5 (15.7)  | 0.002 |
|      | Commission errors                   | Placebo |             | 3.6 (19.7)    | 0.178 | −0.6 (19.5)  | 0.007 |
|      |                                     | Active  |             | 11.0 (23.2)   |       | 14.3 (22.8)  |       |
|      |                                     | Placebo | 92.8 (16.3) | 97.1 (16.3)   | 0.095 | 101.0 (16.8) | 0.002 |
|      |                                     | Active  | 98.4 (16.0) | 98.2 (15.9)   | 0.939 | 100.1 (14.6) | 0.597 |
|      |                                     | Placebo |             | 4.3 (14.1)    | 0.243 | 8.3 (13.9)   | 0.109 |
|      |                                     | Active  |             | −0.2 (16.2)   |       | 1.7 (17.8)   |       |

|                            |                                     |         |              |              |       |              |       |
|----------------------------|-------------------------------------|---------|--------------|--------------|-------|--------------|-------|
| POET<br>(positive emotion) | Correct hits                        | Placebo | 98.4 (12.6)  | 96.2 (14.8)  | 0.475 | 90.3 (24.0)  | 0.055 |
|                            |                                     | Active  | 89.5 (21.1)  | 100.6 (11.4) | 0.003 | 97.2 (17.3)  | 0.020 |
|                            |                                     | Placebo |              | -2.2 (16.9)  | 0.005 | -8.1 (22.9)  | 0.003 |
|                            |                                     | Active  |              | 11.1 (19.2)  |       | 7.7 (17.5)   |       |
|                            | Reaction time (ms)                  | Placebo | 80.6 (21.7)  | 77.3 (22.3)  | 0.244 | 82.3 (23.0)  | 0.522 |
|                            |                                     | Active  | 81.2 (19.9)  | 82.9 (19.9)  | 0.628 | 85.2 (22.0)  | 0.244 |
|                            |                                     | Placebo |              | -3.3 (15.8)  | 0.262 | 1.8 (15.3)   | 0.603 |
|                            |                                     | Active  |              | 1.7 (19.1)   |       | 4.0 (18.8)   |       |
| POET<br>(negative emotion) | Correct hits                        | Placebo | 78.6 (25.9)  | 85.8 (27.8)  | 0.146 | 86.4 (22.6)  | 0.084 |
|                            |                                     | Active  | 79.0 (33.7)  | 85.2 (27.3)  | 0.284 | 93.9 (24.0)  | 0.006 |
|                            |                                     | Placebo |              | 7.2 (27.4)   | 0.891 | 7.8 (24.6)   | 0.293 |
|                            |                                     | Active  |              | 6.2 (31.6)   |       | 14.8 (28.1)  |       |
|                            | Reaction time (ms)                  | Placebo | 100.3 (14.3) | 96.6 (15.4)  | 0.146 | 101.0 (16.5) | 0.673 |
|                            |                                     | Active  | 98.5 (14.7)  | 99.0 (18.6)  | 0.860 | 101.1 (15.1) | 0.275 |
|                            |                                     | Placebo |              | -3.7 (13.9)  | 0.262 | 0.7 (9.5)    | 0.517 |
|                            |                                     | Active  |              | 0.5 (15.2)   |       | 2.6 (12.9)   |       |
| NVRT                       | Correct responses                   | Placebo | 98.2 (15.2)  | 95.7 (16.4)  | 0.386 | 98.8 (15.3)  | 0.822 |
|                            |                                     | Active  | 96.1 (14.5)  | 99.8 (12.4)  | 0.160 | 98.0 (12.8)  | 0.488 |
|                            |                                     | Placebo |              | -2.5 (15.9)  | 0.111 | 0.6 (14.8)   | 0.738 |
|                            |                                     | Active  |              | 3.7 (14.3)   |       | 1.8 (14.6)   |       |
|                            | Average reaction time, correct (ms) | Placebo | 113.2 (11.5) | 113.4 (11.9) | 0.945 | 113.8 (9.0)  | 0.784 |
|                            |                                     | Active  | 112.5 (8.3)  | 114.2 (10.0) | 0.441 | 116.0 (6.9)  | 0.037 |

|                |                                     |         |              |              |       |              |       |
|----------------|-------------------------------------|---------|--------------|--------------|-------|--------------|-------|
| FPCPT (part 3) |                                     | Placebo |              | 0.2 (12.7)   | 0.631 | 0.6 (12.2)   | 0.287 |
|                |                                     | Active  |              | 1.6 (11.7)   |       | 3.5 (8.9)    |       |
|                | Commission errors                   | Placebo | 92.1 (16.5)  | 88.5 (17.8)  | 0.222 | 92.2 (18.2)  | 0.973 |
|                |                                     | Active  | 90.8 (16.3)  | 94.0 (15.3)  | 0.223 | 91.0 (14.1)  | 0.963 |
|                |                                     | Placebo |              | −3.6 (16.4)  | 0.084 | 0.1 (15.6)   | 0.993 |
|                |                                     | Active  |              | 3.2 (14.3)   |       | 0.1 (15.2)   |       |
|                | Omission errors                     | Placebo | 108.9 (9.4)  | 110.7 (7.2)  | 0.322 | 109.3 (10.5) | 0.812 |
|                |                                     | Active  | 107.5 (11.1) | 108.7 (9.6)  | 0.517 | 110.5 (8.2)  | 0.063 |
|                |                                     | Placebo |              | 1.8 (10.2)   | 0.810 | 0.4 (9.6)    | 0.264 |
|                |                                     | Active  |              | 1.2 (10.1)   |       | 3.0 (8.6)    |       |
|                | Correct responses                   | Placebo | 111.9 (12.8) | 111.3 (6.9)  | 0.802 | 112.0 (13.4) | 0.975 |
|                |                                     | Active  | 111.0 (10.7) | 113.2 (20.5) | 0.549 | 116.5 (8.4)  | 0.007 |
|                |                                     | Placebo |              | −0.6 (14.0)  | 0.520 | 0.1 (16.5)   | 0.126 |
|                |                                     | Active  |              | 2.2 (20.5)   |       | 5.5 (10.7)   |       |
|                | Average response time, correct (ms) | Placebo | 100.5 (15.7) | 99.9 (14.6)  | 0.834 | 99.5 (12.7)  | 0.632 |
|                |                                     | Active  | 103.5 (9.0)  | 100.6 (17.9) | 0.383 | 104.1 (8.0)  | 0.680 |
|                |                                     | Placebo |              | −0.5 (14.2)  | 0.564 | −1.0 (11.3)  | 0.534 |
|                |                                     | Active  |              | −2.9 (18.4)  |       | 0.5 (6.9)    |       |
|                | Incorrect responses                 | Placebo | 102.2 (12.1) | 102.1 (11.5) | 0.984 | 101.1 (14.5) | 0.751 |
|                |                                     | Active  | 103.8 (2.5)  | 100.5 (15.4) | 0.196 | 103.2 (3.0)  | 0.275 |
|                |                                     | Placebo |              | −0.1 (17.1)  | 0.414 | −1.1 (19.4)  | 0.899 |
|                |                                     | Active  |              | −3.3 (13.9)  |       | −0.6 (3.2)   |       |

|                |                                       |         |              |              |        |              |       |
|----------------|---------------------------------------|---------|--------------|--------------|--------|--------------|-------|
| FPCPT (part 4) | Average response time, incorrect (ms) | Placebo | 73.0 (–)     | 76.0 (9.9)   | –      | 62.0 (16.3)  | –     |
|                |                                       | Active  | 77.3 (12.4)  | 77.3 (7.6)   | 0.395  | 80.3 (15.7)  | 0.979 |
|                |                                       | Placebo |              | – (–)        | –      | – (–)        | –     |
|                |                                       | Active  |              | 7.0 (7.1)    |        | –1.0 (42.4)  |       |
|                | Omission errors                       | Placebo | 111.9 (12.8) | 111.3 (6.9)  | 0.802  | 112.0 (13.4) | 0.975 |
|                |                                       | Active  | 111.0 (10.7) | 113.2 (20.5) | 0.549  | 116.5 (8.4)  | 0.007 |
|                |                                       | Placebo |              | –0.6 (14.0)  | 0.520  | 0.1 (16.5)   | 0.126 |
|                |                                       | Active  |              | 2.2 (20.5)   |        | 5.5 (10.7)   |       |
|                | Correct responses                     | Placebo | 106.7 (14.9) | 105.4 (16.2) | 0.698  | 108.2 (12.2) | 0.535 |
|                |                                       | Active  | 105.3 (13.8) | 112.4 (10.1) | <0.001 | 108.9 (11.8) | 0.130 |
|                |                                       | Placebo |              | –1.3 (19.0)  | 0.028  | 1.5 (13.8)   | 0.530 |
|                |                                       | Active  |              | 7.2 (9.1)    |        | 3.7 (13.1)   |       |
|                | Average response time, correct (ms)   | Placebo | 101.1 (13.6) | 103.8 (9.0)  | 0.219  | 103.1 (11.4) | 0.315 |
|                |                                       | Active  | 103.2 (8.9)  | 104.9 (8.3)  | 0.249  | 104.8 (11.9) | 0.380 |
|                |                                       | Placebo |              | 2.8 (12.4)   | 0.683  | 2.1 (11.4)   | 0.859 |
|                |                                       | Active  |              | 1.7 (7.9)    |        | 1.6 (9.9)    |       |
|                | Incorrect responses                   | Placebo | 100.5 (11.8) | 101.5 (11.4) | 0.677  | 98.0 (13.0)  | 0.296 |
|                |                                       | Active  | 98.7 (12.3)  | 98.7 (11.0)  | 1.000  | 101.1 (7.9)  | 0.267 |
|                |                                       | Placebo |              | 1.1 (14.3)   | 0.768  | –2.5 (13.3)  | 0.128 |
|                |                                       | Active  |              | 0.0 (14.1)   |        | 2.4 (11.6)   |       |
|                | Average response time, incorrect (ms) | Placebo | 95.9 (4.8)   | 95.0 (5.8)   | 0.747  | 93.5 (8.4)   | 0.195 |
|                |                                       | Active  | 97.5 (5.2)   | 94.9 (7.8)   | 0.313  | 95.5 (6.6)   | 0.392 |



|                 |         |              |              |        |              |       |
|-----------------|---------|--------------|--------------|--------|--------------|-------|
| Omission errors | Placebo |              | 0.6 (7.3)    | 0.351  | −3.4 (10.2)  | 0.491 |
|                 | Active  |              | −1.9 (7.4)   |        | −1.4 (7.2)   |       |
|                 | Placebo | 106.7 (14.9) | 105.4 (16.2) | 0.698  | 108.2 (12.2) | 0.535 |
|                 | Active  | 105.3 (13.8) | 112.4 (10.1) | <0.001 | 108.9 (11.8) | 0.130 |
|                 | Placebo |              | −1.3 (19.0)  | 0.028  | 1.5 (13.8)   | 0.530 |
|                 | Active  |              | 7.2 (9.1)    |        | 3.7 (13.1)   |       |

Data at week 12 were compared with those at week 0, using the paired *t*-test.

Comparisons between the placebo and active groups were tested by the unpaired *t*-test.

VBM, verbal memory test; VIM, visual memory test; FTT, finger tapping test; SDC, symbol digit coding test; ST, Stroop test; SAT, shift attention test; CPT, continuous performance test; POET, perception of emotion test; NVRT, nonverbal reasoning test; FPCPT, four-part continuous performance test
