# Supplementary material for: Effect of Continuous Ingestion of Bifidobacteria and Dietary Fiber on Improvement in Cognitive Function: A Randomized, Double-Blind, Placebo-Controlled Trial
Source: MDPI journal article supplement (doi:10.3390/nu15194175), 2023-09-27
Supplement: s1 [file s1]

Table S3. Post-intervention changes in each inflammatory marker (all data).

|                                |         | Week 0       | Week 12      |         | Change       |         |
|--------------------------------|---------|--------------|--------------|---------|--------------|---------|
|                                |         | Mean (SD)    | Mean (SD)    | P-value | Mean (SD)    | P-value |
| Adenosine deaminase (ADA)      | Placebo | 5.39 (0.41)  | 5.46 (0.39)  | 0.068   | 0.08 (0.23)  | 0.052   |
|                                | Active  | 5.53 (0.37)  | 5.50 (0.30)  | 0.345   | −0.04 (0.24) |         |
| Axin-1 (AXIN1)                 | Placebo | 1.46 (0.59)  | 1.63 (0.47)  | 0.149   | 0.18 (0.66)  | 0.910   |
|                                | Active  | 1.50 (0.55)  | 1.70 (0.60)  | 0.101   | 0.20 (0.61)  |         |
| Caspase-8 (CASP-8)             | Placebo | 1.48 (0.43)  | 1.60 (0.44)  | 0.065   | 0.11 (0.33)  | 0.786   |
|                                | Active  | 1.63 (0.39)  | 1.70 (0.40)  | 0.052   | 0.09 (0.25)  |         |
| C-C motif chemokine 19 (CCL19) | Placebo | 8.73 (0.77)  | 8.88 (0.90)  | 0.163   | 0.15 (0.60)  | 0.081   |
|                                | Active  | 8.72 (0.49)  | 8.70 (0.60)  | 0.278   | −0.06 (0.31) |         |
| C-C motif chemokine 20 (CCL20) | Placebo | 7.60 (0.91)  | 7.75 (1.19)  | 0.288   | 0.15 (0.82)  | 0.121   |
|                                | Active  | 7.30 (0.66)  | 7.20 (0.60)  | 0.215   | −0.11 (0.46) |         |
| C-C motif chemokine 23 (CCL23) | Placebo | 10.86 (0.35) | 10.88 (0.25) | 0.718   | 0.02 (0.25)  | 0.021   |
|                                | Active  | 11.09 (0.46) | 10.90 (0.40) | 0.012   | −0.15 (0.32) |         |
| C-C motif chemokine 25 (CCL25) | Placebo | 6.72 (0.64)  | 6.83 (0.60)  | 0.090   | 0.10 (0.34)  | 0.203   |
|                                | Active  | 6.83 (0.55)  | 6.80 (0.50)  | 0.944   | 0.00 (0.27)  |         |
| C-C motif chemokine 28 (CCL28) | Placebo | 2.62 (0.50)  | 2.64 (0.49)  | 0.711   | 0.02 (0.27)  | 0.063   |
|                                | Active  | 2.73 (0.46)  | 2.60 (0.50)  | 0.009   | −0.09 (0.18) |         |
| C-C motif chemokine 3 (CCL3)   | Placebo | 7.20 (0.68)  | 7.35 (1.02)  | 0.152   | 0.15 (0.59)  | 0.624   |
|                                | Active  | 7.17 (0.72)  | 7.30 (0.80)  | 0.164   | 0.09 (0.34)  |         |
| C-C motif chemokine 4 (CCL4)   | Placebo | 8.07 (0.56)  | 8.26 (0.93)  | 0.118   | 0.18 (0.65)  | 0.354   |
|                                | Active  | 8.21 (0.60)  | 8.30 (0.60)  | 0.387   | 0.06 (0.36)  |         |

|                                                                      |         |              |              |       |              |       |
|----------------------------------------------------------------------|---------|--------------|--------------|-------|--------------|-------|
| CD40L receptor (CD40)                                                | Placebo | 11.28 (0.48) | 11.27 (0.38) | 0.828 | −0.01 (0.31) | 0.816 |
|                                                                      | Active  | 11.38 (0.42) | 11.30 (0.40) | 0.565 | −0.03 (0.27) |       |
| CUB domain-containing protein 1 (CDCP1)                              | Placebo | 2.44 (0.65)  | 2.49 (0.60)  | 0.347 | 0.05 (0.28)  | 0.227 |
|                                                                      | Active  | 2.54 (0.72)  | 2.50 (0.60)  | 0.442 | −0.04 (0.28) |       |
| C-X-C motif chemokine 1 (CXCL1)                                      | Placebo | 9.66 (0.49)  | 9.72 (0.48)  | 0.294 | 0.05 (0.29)  | 0.688 |
|                                                                      | Active  | 9.79 (0.58)  | 9.80 (0.60)  | 0.724 | 0.02 (0.34)  |       |
| C-X-C motif chemokine 10 (CXCL10)                                    | Placebo | 9.51 (0.84)  | 9.71 (1.12)  | 0.187 | 0.20 (0.84)  | 0.394 |
|                                                                      | Active  | 9.38 (0.56)  | 9.40 (0.70)  | 0.725 | 0.04 (0.59)  |       |
| C-X-C motif chemokine 11 (CXCL11)                                    | Placebo | 8.31 (0.59)  | 8.54 (0.92)  | 0.148 | 0.24 (0.92)  | 0.340 |
|                                                                      | Active  | 8.38 (0.52)  | 8.40 (0.60)  | 0.430 | 0.06 (0.41)  |       |
| C-X-C motif chemokine 5 (CXCL5)                                      | Placebo | 11.74 (0.56) | 11.77 (0.51) | 0.499 | 0.03 (0.29)  | 0.286 |
|                                                                      | Active  | 11.83 (0.61) | 11.80 (0.60) | 0.413 | −0.05 (0.30) |       |
| C-X-C motif chemokine 6 (CXCL6)                                      | Placebo | 9.23 (0.61)  | 9.22 (0.57)  | 0.824 | −0.01 (0.28) | 0.594 |
|                                                                      | Active  | 9.35 (0.46)  | 9.30 (0.40)  | 0.267 | −0.04 (0.21) |       |
| C-X-C motif chemokine 9 (CXCL9)                                      | Placebo | 7.18 (0.74)  | 7.30 (0.84)  | 0.156 | 0.12 (0.47)  | 0.442 |
|                                                                      | Active  | 7.02 (0.60)  | 7.00 (0.80)  | 0.950 | 0.01 (0.66)  |       |
| Cystatin D (CST5)                                                    | Placebo | 5.79 (0.61)  | 5.84 (0.63)  | 0.330 | 0.04 (0.25)  | 0.870 |
|                                                                      | Active  | 5.95 (0.62)  | 6.00 (0.60)  | 0.448 | 0.03 (0.24)  |       |
| Delta and Notch-like epidermal growth factor-related receptor (DNER) | Placebo | 9.11 (0.34)  | 9.06 (0.26)  | 0.226 | −0.05 (0.25) | 0.280 |
|                                                                      | Active  | 9.20 (0.30)  | 9.10 (0.30)  | 0.003 | −0.12 (0.20) |       |
| Eotaxin (CCL11)                                                      | Placebo | 8.66 (0.43)  | 8.76 (0.36)  | 0.029 | 0.09 (0.24)  | 0.054 |
|                                                                      | Active  | 8.72 (0.29)  | 8.70 (0.20)  | 0.649 | −0.02 (0.21) |       |

|                                                                        |         |             |             |       |              |       |
|------------------------------------------------------------------------|---------|-------------|-------------|-------|--------------|-------|
| Eukaryotic translation initiation factor 4E-binding protein 1 (4E-BP1) | Placebo | 7.32 (0.70) | 7.55 (0.69) | 0.150 | 0.23 (0.90)  | 0.811 |
|                                                                        | Active  | 7.34 (0.67) | 7.50 (0.80) | 0.328 | 0.17 (0.96)  |       |
| Fibroblast growth factor 19 (FGF-19)                                   | Placebo | 9.19 (0.91) | 9.44 (0.84) | 0.135 | 0.25 (0.94)  | 0.337 |
|                                                                        | Active  | 9.11 (0.90) | 9.10 (1.00) | 0.865 | 0.03 (0.88)  |       |
| Fibroblast growth factor 21 (FGF-21)                                   | Placebo | 5.84 (1.26) | 6.00 (1.56) | 0.286 | 0.17 (0.88)  | 0.273 |
|                                                                        | Active  | 5.75 (1.23) | 5.60 (1.00) | 0.633 | −0.07 (0.81) |       |
| Fibroblast growth factor 5 (FGF-5)                                     | Placebo | 2.42 (0.29) | 2.47 (0.25) | 0.094 | 0.05 (0.17)  | 0.180 |
|                                                                        | Active  | 2.59 (0.28) | 2.60 (0.20) | 0.723 | −0.01 (0.21) |       |
| Fms-related tyrosine kinase 3 ligand (Flt3L)                           | Placebo | 9.37 (0.45) | 9.39 (0.45) | 0.634 | 0.03 (0.31)  | 0.854 |
|                                                                        | Active  | 9.29 (0.49) | 9.30 (0.40) | 0.795 | 0.01 (0.26)  |       |
| Fractalkine (CX3CL1)                                                   | Placebo | 3.66 (0.48) | 3.82 (0.51) | 0.059 | 0.17 (0.48)  | 0.058 |
|                                                                        | Active  | 3.86 (0.41) | 3.80 (0.40) | 0.520 | −0.04 (0.34) |       |
| Glial cell line-derived neurotrophic factor (GDNF)                     | Placebo | 1.98 (0.47) | 2.19 (0.44) | 0.003 | 0.20 (0.33)  | 0.055 |
|                                                                        | Active  | 2.15 (0.33) | 2.10 (0.30) | 0.447 | 0.04 (0.28)  |       |
| Hepatocyte growth factor (HGF)                                         | Placebo | 9.64 (0.45) | 9.76 (0.47) | 0.010 | 0.13 (0.27)  | 0.282 |
|                                                                        | Active  | 9.66 (0.48) | 9.70 (0.40) | 0.502 | 0.04 (0.35)  |       |
| Interferon gamma (IFN-gamma)                                           | Placebo | 6.57 (0.69) | 6.75 (0.97) | 0.226 | 0.17 (0.81)  | 0.166 |
|                                                                        | Active  | 6.72 (0.69) | 6.60 (0.70) | 0.470 | −0.08 (0.63) |       |
| Interleukin-6 (IL-6)                                                   | Placebo | 2.72 (0.58) | 2.94 (0.78) | 0.031 | 0.22 (0.55)  | 0.623 |
|                                                                        | Active  | 2.93 (0.74) | 3.10 (0.80) | 0.491 | 0.12 (0.95)  |       |
| Interleukin-7 (IL-7)                                                   | Placebo | 4.43 (0.44) | 4.61 (0.44) | 0.009 | 0.18 (0.37)  | 0.127 |
|                                                                        | Active  | 4.52 (0.47) | 4.50 (0.50) | 0.739 | 0.03 (0.41)  |       |

|                                                                               |         |             |             |       |              |       |
|-------------------------------------------------------------------------------|---------|-------------|-------------|-------|--------------|-------|
| Interleukin-8 (IL-8)                                                          | Placebo | 5.97 (0.41) | 6.22 (0.49) | 0.012 | 0.24 (0.53)  | 0.063 |
|                                                                               | Active  | 6.15 (0.75) | 6.20 (0.70) | 0.733 | 0.02 (0.37)  |       |
| Interleukin-10 (IL-10)                                                        | Placebo | 3.22 (0.52) | 3.44 (0.78) | 0.035 | 0.22 (0.56)  | 0.064 |
|                                                                               | Active  | 3.47 (0.44) | 3.50 (0.40) | 0.975 | 0.00 (0.28)  |       |
| Interleukin-10 receptor subunit alpha (IL-10RA)                               | Placebo | 1.65 (0.91) | 1.78 (0.98) | 0.028 | 0.11 (0.27)  | 0.151 |
|                                                                               | Active  | 1.78 (0.75) | 1.80 (0.80) | 0.806 | 0.01 (0.25)  |       |
| Interleukin-10 receptor subunit beta (IL-10RB)                                | Placebo | 7.18 (0.35) | 7.20 (0.30) | 0.418 | 0.02 (0.16)  | 0.178 |
|                                                                               | Active  | 7.30 (0.30) | 7.30 (0.30) | 0.274 | −0.03 (0.15) |       |
| Interleukin-12 subunit beta (IL-12B)                                          | Placebo | 6.78 (0.69) | 6.78 (0.75) | 0.968 | 0.00 (0.33)  | 0.269 |
|                                                                               | Active  | 6.86 (0.37) | 6.80 (0.40) | 0.069 | −0.08 (0.25) |       |
| Interleukin-15 receptor subunit alpha (IL-15RA)                               | Placebo | 1.56 (0.44) | 1.66 (0.40) | 0.022 | 0.10 (0.22)  | 0.333 |
|                                                                               | Active  | 1.67 (0.36) | 1.70 (0.30) | 0.181 | 0.05 (0.18)  |       |
| Interleukin-17A (IL-17A)                                                      | Placebo | 1.77 (0.67) | 1.79 (0.62) | 0.607 | −0.05 (0.50) | 0.724 |
|                                                                               | Active  | 1.96 (0.76) | 1.90 (0.70) | 0.080 | −0.09 (0.24) |       |
| Interleukin-17C (IL-17C)                                                      | Placebo | 2.95 (0.89) | 2.83 (0.97) | 0.537 | −0.12 (1.07) | 0.718 |
|                                                                               | Active  | 2.91 (0.54) | 2.70 (0.50) | 0.032 | −0.19 (0.47) |       |
| Interleukin-18 (IL-18)                                                        | Placebo | 9.10 (0.67) | 9.28 (0.68) | 0.002 | 0.18 (0.30)  | 0.064 |
|                                                                               | Active  | 9.14 (0.63) | 9.20 (0.50) | 0.912 | 0.01 (0.41)  |       |
| Interleukin-18 receptor 1 (IL-18R1)                                           | Placebo | 8.23 (0.55) | 8.37 (0.53) | 0.006 | 0.14 (0.27)  | 0.214 |
|                                                                               | Active  | 8.29 (0.36) | 8.40 (0.40) | 0.115 | 0.06 (0.21)  |       |
| Latency-associated peptide transforming growth factor beta-1 (LAP TGF-beta-1) | Placebo | 8.51 (0.36) | 8.42 (0.37) | 0.255 | −0.09 (0.44) | 0.933 |
|                                                                               | Active  | 8.59 (0.37) | 8.50 (0.40) | 0.223 | −0.10 (0.43) |       |

|                                                |         |              |              |       |              |       |
|------------------------------------------------|---------|--------------|--------------|-------|--------------|-------|
| Leukemia inhibitory factor receptor (LIF-R)    | Placebo | 3.36 (0.27)  | 3.39 (0.23)  | 0.459 | 0.02 (0.19)  | 0.012 |
|                                                | Active  | 3.49 (0.30)  | 3.40 (0.20)  | 0.008 | −0.10 (0.19) |       |
| Macrophage colony-stimulating factor 1 (CSF-1) | Placebo | 9.93 (0.39)  | 9.98 (0.37)  | 0.159 | 0.05 (0.21)  | 0.103 |
|                                                | Active  | 10.04 (0.27) | 10.00 (0.20) | 0.386 | −0.03 (0.16) |       |
| Matrix metalloproteinase-1 (MMP-1)             | Placebo | 15.26 (0.7)  | 15.23 (0.73) | 0.380 | −0.03 (0.21) | 0.582 |
|                                                | Active  | 15.26 (0.82) | 15.30 (0.80) | 0.896 | 0.00 (0.19)  |       |
| Matrix metalloproteinase-10 (MMP-10)           | Placebo | 9.02 (0.48)  | 9.04 (0.44)  | 0.830 | 0.02 (0.44)  | 0.885 |
|                                                | Active  | 9.08 (0.48)  | 9.10 (0.70)  | 0.713 | 0.03 (0.50)  |       |
| Monocyte chemotactic protein 1 (MCP-1)         | Placebo | 13.18 (0.44) | 13.30 (0.43) | 0.148 | 0.12 (0.47)  | 0.381 |
|                                                | Active  | 13.10 (0.4)  | 13.10 (0.40) | 0.568 | 0.03 (0.30)  |       |
| Monocyte chemotactic protein 2 (MCP-2)         | Placebo | 10.56 (0.63) | 10.74 (0.83) | 0.198 | 0.18 (0.79)  | 0.372 |
|                                                | Active  | 10.60 (0.84) | 10.60 (0.80) | 0.563 | 0.04 (0.36)  |       |
| Monocyte chemotactic protein 3 (MCP-3)         | Placebo | 1.70 (0.61)  | 1.84 (0.53)  | 0.148 | 0.14 (0.52)  | 0.239 |
|                                                | Active  | 1.76 (0.38)  | 1.70 (0.40)  | 0.957 | 0.00 (0.35)  |       |
| Monocyte chemotactic protein 4 (MCP-4)         | Placebo | 14.73 (0.70) | 14.70 (0.68) | 0.565 | −0.03 (0.33) | 0.445 |
|                                                | Active  | 14.90 (0.46) | 14.80 (0.50) | 0.093 | −0.10 (0.30) |       |
| Natural killer cell receptor 2B4 (CD244)       | Placebo | 5.89 (0.61)  | 5.92 (0.60)  | 0.361 | 0.03 (0.20)  | 0.124 |
|                                                | Active  | 5.94 (0.68)  | 5.90 (0.70)  | 0.228 | −0.04 (0.16) |       |
| Neurotrophin-3 (NT-3)                          | Placebo | 2.43 (0.30)  | 2.48 (0.33)  | 0.330 | 0.05 (0.27)  | 0.238 |
|                                                | Active  | 2.63 (0.44)  | 2.60 (0.40)  | 0.490 | −0.03 (0.26) |       |
| Oncostatin-M (OSM)                             | Placebo | 5.21 (0.74)  | 5.46 (0.81)  | 0.027 | 0.25 (0.63)  | 0.677 |
|                                                | Active  | 5.27 (0.98)  | 5.40 (0.80)  | 0.187 | 0.18 (0.73)  |       |

|                                                    |         |              |              |       |              |       |
|----------------------------------------------------|---------|--------------|--------------|-------|--------------|-------|
| Osteoprotegerin (OPG)                              | Placebo | 10.49 (0.40) | 10.58 (0.41) | 0.134 | 0.09 (0.34)  | 0.052 |
|                                                    | Active  | 10.60 (0.30) | 10.60 (0.20) | 0.188 | −0.04 (0.17) |       |
| Programmed cell death 1 ligand 1 (PD-L1)           | Placebo | 4.85 (0.33)  | 5.01 (0.38)  | 0.016 | 0.16 (0.36)  | 0.115 |
|                                                    | Active  | 4.96 (0.27)  | 5.00 (0.30)  | 0.391 | 0.04 (0.23)  |       |
| Protein S100-A12 (EN-RAGE)                         | Placebo | 4.77 (0.68)  | 5.24 (0.68)  | 0.002 | 0.47 (0.80)  | 0.353 |
|                                                    | Active  | 4.88 (0.77)  | 5.10 (0.70)  | 0.061 | 0.28 (0.78)  |       |
| Signaling lymphocytic activation molecule (SLAMF1) | Placebo | 1.99 (0.41)  | 2.04 (0.34)  | 0.305 | 0.05 (0.26)  | 0.308 |
|                                                    | Active  | 2.04 (0.35)  | 2.00 (0.40)  | 0.694 | −0.02 (0.23) |       |
| SIR2-like protein 2 (SIRT2)                        | Placebo | 2.39 (0.50)  | 2.52 (0.60)  | 0.059 | 0.17 (0.48)  | 0.460 |
|                                                    | Active  | 2.33 (0.44)  | 2.60 (0.50)  | 0.013 | 0.27 (0.55)  |       |
| STAM-binding protein (STAMPB)                      | Placebo | 3.64 (0.43)  | 3.75 (0.39)  | 0.111 | 0.11 (0.38)  | 0.973 |
|                                                    | Active  | 3.71 (0.32)  | 3.80 (0.40)  | 0.178 | 0.11 (0.44)  |       |
| Stem cell factor (SCF)                             | Placebo | 9.90 (0.28)  | 9.94 (0.24)  | 0.105 | 0.04 (0.13)  | 0.257 |
|                                                    | Active  | 9.87 (0.32)  | 9.90 (0.30)  | 0.938 | 0.00 (0.15)  |       |
| Sulfotransferase 1A1 (ST1A1)                       | Placebo | 2.19 (1.16)  | 1.75 (0.83)  | 0.111 | −0.36 (1.10) | 0.020 |
|                                                    | Active  | 1.82 (0.82)  | 2.10 (1.00)  | 0.079 | 0.33 (0.86)  |       |
| T-cell surface glycoprotein CD5 (CD5)              | Placebo | 5.92 (0.40)  | 5.91 (0.37)  | 0.864 | −0.01 (0.19) | 0.092 |
|                                                    | Active  | 6.02 (0.39)  | 5.90 (0.30)  | 0.017 | −0.09 (0.20) |       |
| T-cell surface glycoprotein CD6 isoform (CD6)      | Placebo | 5.32 (0.54)  | 5.36 (0.50)  | 0.272 | 0.04 (0.23)  | 0.110 |
|                                                    | Active  | 5.43 (0.47)  | 5.40 (0.40)  | 0.249 | −0.05 (0.23) |       |
| T-cell surface glycoprotein CD8 alpha chain (CD8A) | Placebo | 9.44 (0.53)  | 9.51 (0.60)  | 0.209 | 0.07 (0.32)  | 0.149 |
|                                                    | Active  | 9.52 (0.42)  | 9.50 (0.40)  | 0.437 | −0.04 (0.31) |       |

|                                                               |         |              |              |       |              |       |
|---------------------------------------------------------------|---------|--------------|--------------|-------|--------------|-------|
| TNF-beta (TNFB)                                               | Placebo | 4.68 (0.50)  | 4.68 (0.53)  | 0.984 | 0.00 (0.33)  | 0.124 |
|                                                               | Active  | 4.77 (0.30)  | 4.70 (0.30)  | 0.013 | -0.11 (0.23) |       |
| TNF-related activation-induced cytokine (TRANCE)              | Placebo | 4.15 (0.55)  | 3.99 (0.55)  | 0.019 | -0.16 (0.37) | 0.168 |
|                                                               | Active  | 4.11 (0.69)  | 4.10 (0.60)  | 0.634 | -0.03 (0.36) |       |
| TNF-related apoptosis-inducing ligand (TRAIL)                 | Placebo | 7.56 (0.34)  | 7.68 (0.43)  | 0.073 | 0.11 (0.35)  | 0.350 |
|                                                               | Active  | 7.63 (0.29)  | 7.70 (0.30)  | 0.313 | 0.04 (0.23)  |       |
| Transforming growth factor alpha (TGF- $\alpha$ )             | Placebo | 3.34 (0.65)  | 3.57 (0.80)  | 0.032 | 0.22 (0.57)  | 0.518 |
|                                                               | Active  | 3.47 (0.78)  | 3.50 (0.60)  | 0.164 | 0.13 (0.50)  |       |
| Tumor necrosis factor (ligand) superfamily, member 12 (TWEAK) | Placebo | 9.10 (0.34)  | 9.08 (0.33)  | 0.658 | -0.01 (0.18) | 0.033 |
|                                                               | Active  | 9.22 (0.26)  | 9.10 (0.20)  | 0.002 | -0.12 (0.19) |       |
| Tumor necrosis factor (TNF)                                   | Placebo | 3.71 (0.56)  | 3.86 (0.67)  | 0.085 | 0.15 (0.50)  | 0.142 |
|                                                               | Active  | 3.76 (0.41)  | 3.80 (0.40)  | 0.893 | 0.01 (0.23)  |       |
| Tumor necrosis factor ligand superfamily member 14 (TNFSF14)  | Placebo | 6.08 (0.89)  | 6.11 (0.76)  | 0.845 | 0.02 (0.73)  | 0.521 |
|                                                               | Active  | 6.04 (0.76)  | 6.20 (0.80)  | 0.321 | 0.15 (0.82)  |       |
| Tumor necrosis factor receptor superfamily member 9 (TNFRSF9) | Placebo | 5.73 (0.54)  | 5.75 (0.51)  | 0.679 | 0.02 (0.28)  | 0.488 |
|                                                               | Active  | 5.79 (0.41)  | 5.80 (0.40)  | 0.542 | -0.02 (0.21) |       |
| Urokinase-type plasminogen activator (uPA)                    | Placebo | 10.34 (0.28) | 10.41 (0.37) | 0.167 | 0.06 (0.26)  | 0.212 |
|                                                               | Active  | 10.51 (0.34) | 10.50 (0.30) | 0.781 | -0.01 (0.20) |       |
| Vascular endothelial growth factor A (VEGF-A)                 | Placebo | 11.76 (0.62) | 11.82 (0.63) | 0.134 | 0.06 (0.24)  | 0.483 |
|                                                               | Active  | 12.09 (0.60) | 12.10 (0.60) | 0.641 | 0.02 (0.24)  |       |

All data were obtained using the Olink® Target 96 Inflammation Panels and are presented as the mean (SD) of log base 2 normalized protein expression values.

Data at week 12 were compared with those at week 0, using the paired *t*-test.

Comparisons between the placebo and active groups were tested by the unpaired *t*-test.
